# Supplementary material for: Extracellular vesicle characteristics and microRNA content in cerebral palsy and typically developed individuals at rest and in response to aerobic exercise
Source: PubMed Central journal article supplement (PMC9811128; doi:10.3389/fphys.2022.1072040), 2022-12-21
Supplement: Image1.pdf [file Image1.pdf]

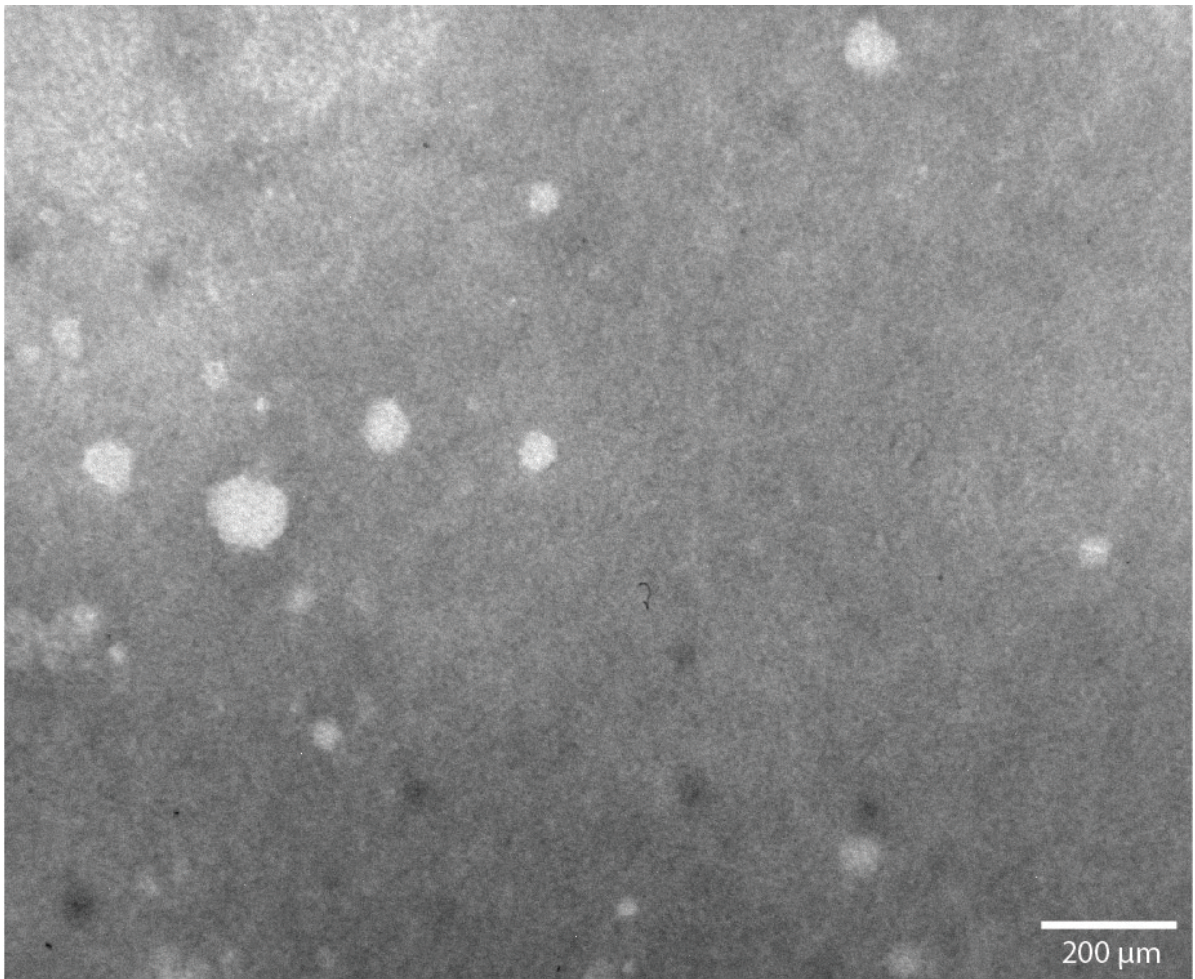

**Supplementary Figure 1** – Transmission electron microscopy (TEM) of extracellular vesicles. TEM visualizations were performed using a Zeiss EM10 transmission electron microscope at 60 kV.
