# Supplementary material for: Extracellular vesicle characteristics and microRNA content in cerebral palsy and typically developed individuals at rest and in response to aerobic exercise
Source: PubMed Central journal article supplement (PMC9811128; doi:10.3389/fphys.2022.1072040), 2022-12-21
Supplement: Image2.pdf [file Image2.pdf]

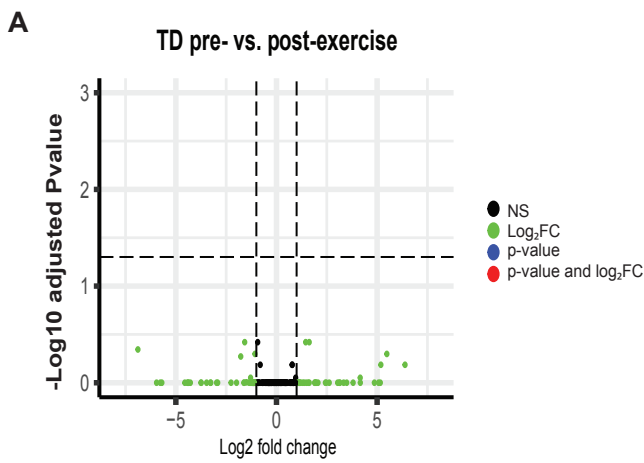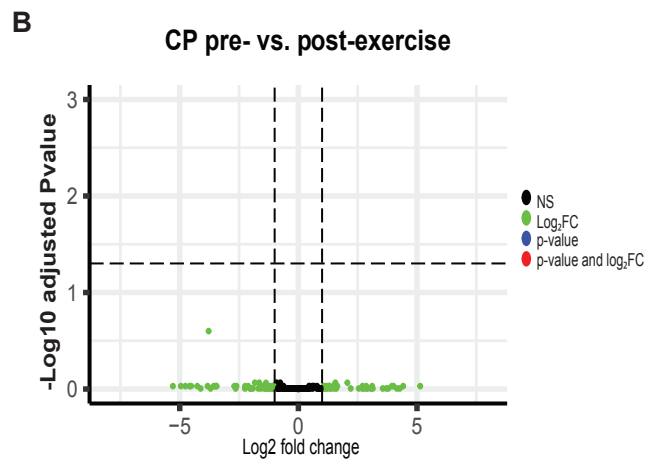

**Supplementary Figure 2** – Volcano plots illustrating differences in EV cargo after exercise in (A) typically developed (TD) and (B) cerebral palsy (CP) individuals. Each point on the scatter plot represents a microRNA where its position on the x-axis corresponds to the average log<sub>2</sub>-fold change after exercise. The position on the y-axis corresponds to log<sub>10</sub> P value of its differential expression after adjustment for false discovery rate.
