# Supplementary material for: Extracellular vesicle characteristics and microRNA content in cerebral palsy and typically developed individuals at rest and in response to aerobic exercise
Source: PubMed Central journal article supplement (PMC9811128; doi:10.3389/fphys.2022.1072040), 2022-12-21
Supplement: Image3.pdf [file Image3.pdf]

dataset: 1  
 target: Pax7  
 length: 6207  
 miRNA : miR-486  
 length: 21  
 mfe: -32.2 kcal/mol  
 p-value: undefined

position 1058  
 target 5' A C AAGCC U 3'  
 UCGG GGCAGC CAG ACAGG  
 AGCC CCGUCG GUC UGUCC  
 miRNA 3' A A U 5'

■ miR-486

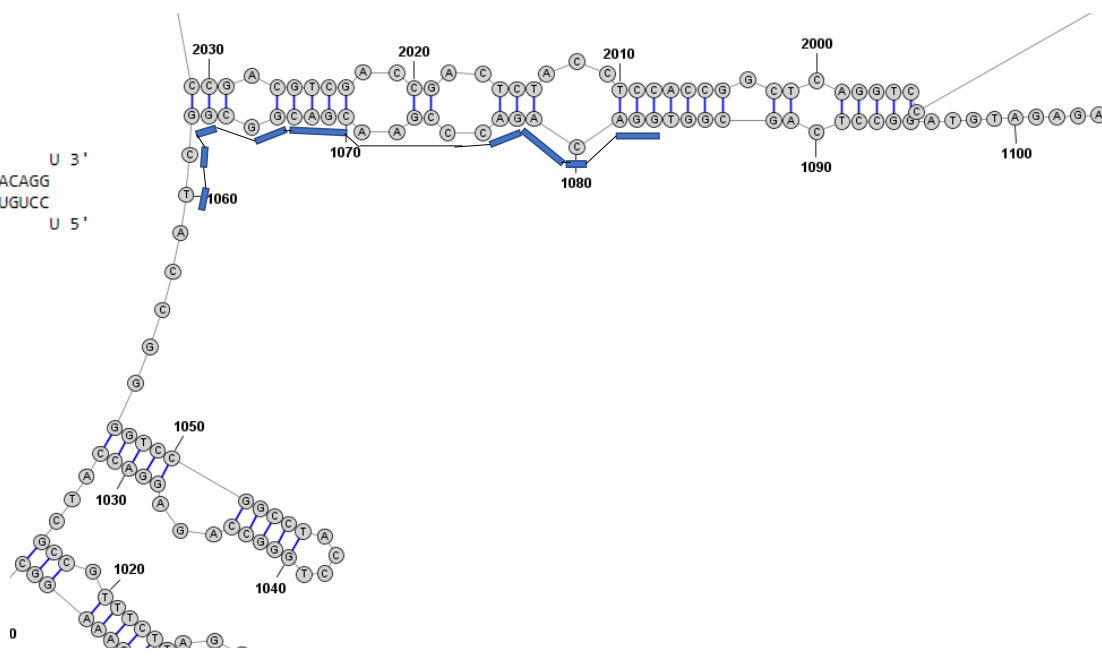

**Supplementary Figure 3** – miRNA binding site prediction on the 3'UTR of Pax7. Blue bars represent miR-486 prediction site. Free energy (mfe): -32.2 kcal/mol.
